# Supplementary material
Source: PubMed Central journal article supplement (PMC4287239)

**Figure S1**

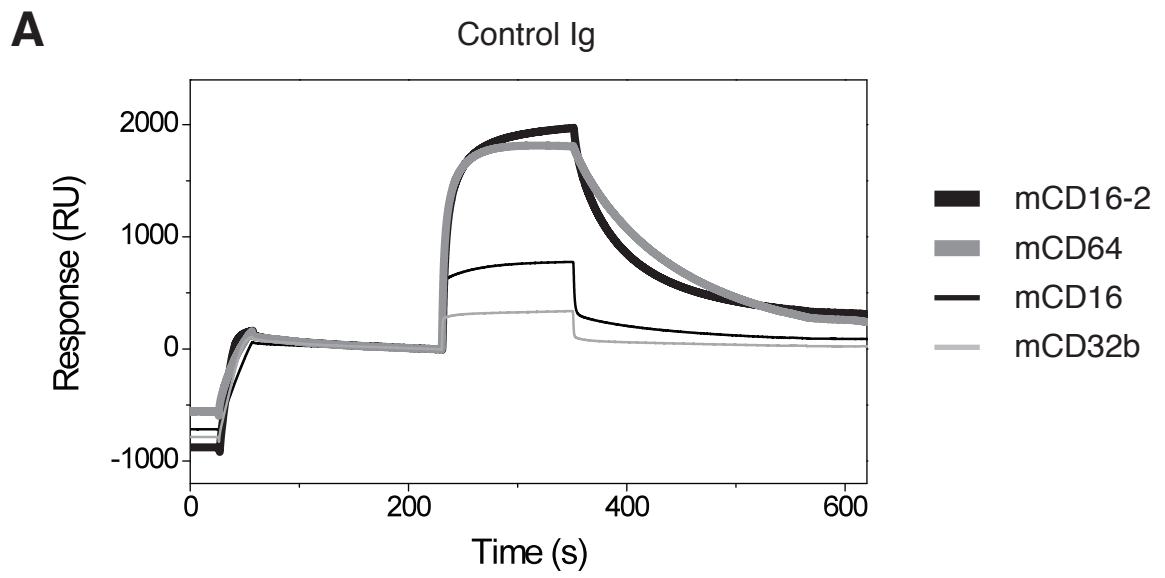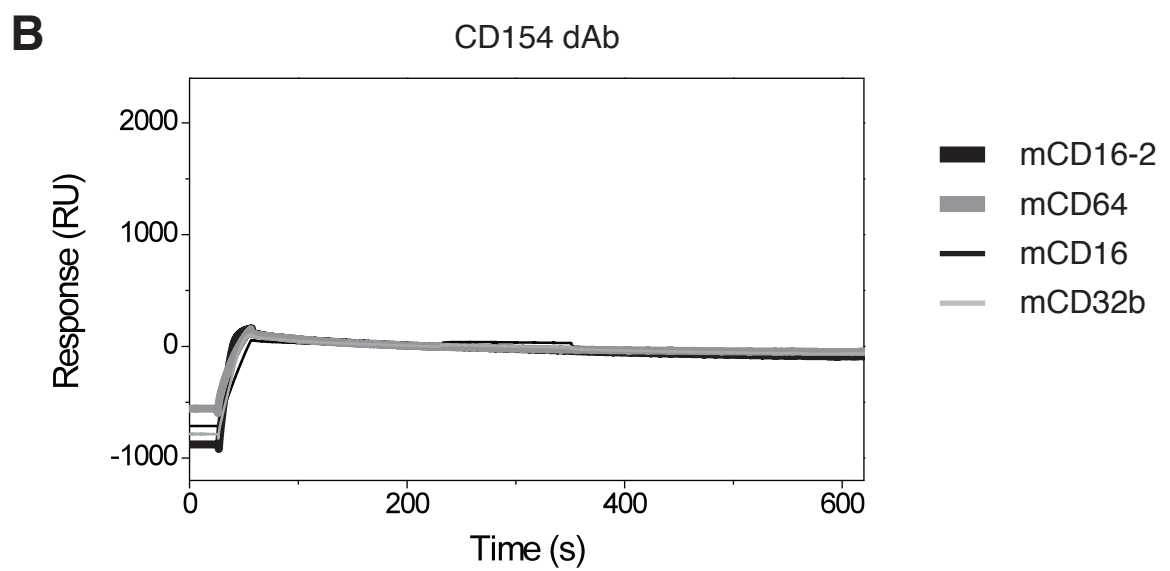

Supplement: NIHMS650928-supplement-Supp_FigureS1.pdf [file NIHMS650928-supplement-Supp_FigureS1.pdf]
